# Supplementary material for: Winter Hive Debris Analysis Is Significant for Assessing the Health Status of Honeybee Colonies (Apis mellifera)
Source: MDPI journal article supplement (doi:10.3390/insects15050350), 2024-05-13
Supplement: s1 [file s1]

**Table S1** Presentation of specific oligonucleotide primers for determining *Nosema* spp. [30].

| Species               | Nucleotide sequence of upstream primers 5'-3' | Nucleotide sequence of downstream primer 5'-3' | Size   |
|-----------------------|-----------------------------------------------|------------------------------------------------|--------|
| <i>Nosema ceranae</i> | CGT TAA AGT GTA GAT AAG ATG TT                | GAC TTA GTA GCC GTC TCT C                      | 143 bp |
| <i>Nosema apis</i>    | GCA TGT CTT TGA CGT ACT ATG                   | GAC TTA GTA GCC GTC TCT C                      | 224 bp |

**Table S2** Presentation of specific oligonucleotide primers for the determination of *C. mellificae* and *L. passim* with the Hymenoptera genome as internal control [25].

| Species                     | Nucleotide sequence of upstream primers 5'-3'     | Nucleotide sequence of downstream primers 5'-3' |
|-----------------------------|---------------------------------------------------|-------------------------------------------------|
| <i>Crithidia mellificae</i> | TAA ATT CAC TAC CTC AAA TTC<br>AAT AAC ATA ATC AT | ATT TAT TGT TGT AAT CGG TTT TAT<br>TGG ATA TGT  |
| <i>Lotmaria passim</i>      | CGA GCT CAT AAA ATA ATG TAA<br>GCA AAA TAA G      | TTT TAG CAA TAT TTT AGC AAC AGT<br>ACC AG       |
| Hymenoptera                 | TAA CTG GCA TTA TGT GGT ACG<br>TC                 | CCT CGA CAC TCA GTG AAG AGC                     |

**Table S3** Presentation of TaqMan probes for determining *C. mellificae* and *L. passim* with the Hymenoptera gene as an internal control [25].

| Species                     | TaqMan probes                            |
|-----------------------------|------------------------------------------|
| <i>Crithidia mellificae</i> | FAM - ACC TAT TAC AGG CAC A - MGB        |
| <i>Lotmaria passim</i>      | HEX - TTG GTG TTT GGC TAT GT - MGB       |
| Hymenoptera                 | Cy5 - AGC TCC TYG CGG GCG GTC CAA - BHQ1 |

**Table S4** Presentation of specific oligonucleotide primers for determining *M. plutonius* and *P. larvae* [31].

| Species                        | Nucleotide sequence of upstream primers 5'-3' | Nucleotide sequence of downstream primers 5'-3' |
|--------------------------------|-----------------------------------------------|-------------------------------------------------|
| <i>Melissococcus plutonius</i> | GAC CTG TTT AGC TAT TAT CAC TA                | CAC CTA CAA TGA ATG ATT CAT TC                  |
| <i>Paenibacillus larvae</i>    | TAC GCT TTT CGA TTC TCT G                     | GTC TGT ACT GAA CCA AGT C                       |

**Table S5** Presentation of TaqMan probes used to determine *M. plutonius* and *P. larvae* [31].

| Species                        | TaqMan probes                                            |
|--------------------------------|----------------------------------------------------------|
| <i>Melissococcus plutonius</i> | Yakima Yellow – TCC GCC TAA GCT ACC ACC TAA GAA C - BHQ1 |
| <i>Paenibacillus larvae</i>    | FAM – ATC TGC TTC CAC TTG TTC ACT CAC CA - BHQ1          |

**Table S6** Presentation of specific oligonucleotide primers for determining *A. tumida* [32].

| Species               | Nucleotide sequence of upstream primers 5'-3' | Nucleotide sequence of downstream primers 5'-3' |
|-----------------------|-----------------------------------------------|-------------------------------------------------|
| <i>Aethina tumida</i> | TCT AAA TAC TAC TTT CTT CGA CCC<br>ATC(A/G)   | TCC TGG TAG AAT TAA AAT ATA<br>AAC TTC TGG      |

**Table S7** Presentation of TaqMan probes used to determine *A. tumida* [32].

| Species               | TaqMan probe                                        |
|-----------------------|-----------------------------------------------------|
| <i>Aethina tumida</i> | ATC CAA TCC TAT ACC AAC ACT TAT TTT GAT TCT TCG GAC |

**Table S8** Sequences of primers used for the RT-qPCR test [34].

| Species | Nucleotide sequence of upstream beginners 5'-3' | Nucleotide sequence of upstream primer 5'-3' |
|---------|-------------------------------------------------|----------------------------------------------|
| ABPV    | CAT ATT GGC GAG CCA CTA TG                      | CTA CCA GGT TCA AAG AA ATT TC                |
| BQCV    | GGT GCG GGA GAT GAT ATA TGG<br>A                | GCC GTC TGA GAT GCA TGA ATA C                |
| DVW     | GCG GCT AAG ATT GTA AAT GTC                     | GTG ACT AGC ATA ACC ATG ATT A                |
| SBV     | AGC CAG TGA TAG ATG CTC                         | AAA TAC TCC CGC CAA ATC AC                   |

**Table S9** TaqMan probes used for RT-qPCR test [34].

| Species | TaqMan probe (5'-3')                               |
|---------|----------------------------------------------------|
| ABPV    | (6-Fam) ATA GTT AAA ACA GCT TTT CAC ACT GG (Tamra) |
| BQCV    | (6-Fam) TTT CCA TCT TTA TCG GTA CGC CGC C (Tamra)  |
| DWV     | (6-Fam) CCT TGA CCA GTA GAC AGC ATC (Tamra)        |
| SBV     | (6-Fam) TGG CTC ATC TGG GAT CAC AAT TTC C (Tamra)  |

**Table S10** Standards used to quantify examined viruses by RT-qPCR test [34].

| Species | Standard | Nucleotide position | Sequence position |
|---------|----------|---------------------|-------------------|
| ABPV    | pB2      | 8115 - 8512         | 397               |
| BQCV    | pNC1-4   | 7850 - 8550         | 700               |
| DWV     | pC1      | 4240 - 4659         | 419               |
| SBV     | SBV      | 5030 - 5368         | 338               |
